# Supplementary material for: Expression of Estrogen Receptor Alpha and Evaluation of Histological Degeneration Scores in Fibroblasts of Hypertrophied Ligamentum Flavum: A Qualitative Study
Source: MDPI journal article supplement (doi:10.3390/biom11121752), 2021-11-24
Supplement: s1 [file s1]

**Table S1.** Influence of additional orthopedic diagnoses on the histopathology (Okuda scores) among LSS patients.

| <b>Osteochondrosis</b>                        | <b>No (N=15)</b> | <b>Yes (N=23)</b> | <b>P.Overall</b> |
|-----------------------------------------------|------------------|-------------------|------------------|
| <b>Okuda degeneration of elastic fibers</b>   |                  |                   | 0.102            |
| mild                                          | 6 (42.9%)        | 16 (69.6%)        |                  |
| moderate                                      | 6 (42.9%)        | 7 (30.4%)         |                  |
| severe                                        | 2 (14.3%)        | 0 (0.00%)         |                  |
| <b>Okuda proliferation of collagen fibers</b> |                  |                   | 0.262            |
| mild                                          | 4 (28.6%)        | 8 (34.8%)         |                  |
| moderate                                      | 8 (57.1%)        | 15 (65.2%)        |                  |
| severe                                        | 2 (14.3%)        | 0 (0.00%)         |                  |
| <b>Okuda loss of elastic fibers</b>           |                  |                   | 0.141            |
| mild                                          | 5 (35.7%)        | 13 (56.5%)        |                  |
| moderate                                      | 7 (50.0%)        | 10 (43.5%)        |                  |
| severe                                        | 2 (14.3%)        | 0 (0.00%)         |                  |
| <b>Structural instability</b>                 | <b>No (N=28)</b> | <b>Yes (N=10)</b> | <b>P.Overall</b> |
| <b>Okuda degeneration of elastic fibers</b>   |                  |                   | 0.584            |
| mild                                          | 17 (63.0%)       | 5 (50.0%)         |                  |
| moderate                                      | 9 (33.3%)        | 4 (40.0%)         |                  |
| severe                                        | 1 (3.70%)        | 1 (10.0%)         |                  |
| <b>Okuda proliferation of collagen fibers</b> |                  |                   | 0.479            |
| mild                                          | 10 (37.0%)       | 2 (20.0%)         |                  |
| moderate                                      | 16 (59.3%)       | 7 (70.0%)         |                  |
| severe                                        | 1 (3.70%)        | 1 (10.0%)         |                  |
| <b>Okuda loss of elastic fibers</b>           |                  |                   | 0.252            |
| mild                                          | 15 (55.6%)       | 3 (30.0%)         |                  |
| moderate                                      | 11 (40.7%)       | 6 (60.0%)         |                  |
| severe                                        | 1 (3.70%)        | 1 (10.0%)         |                  |
| <b>Scoliosis</b>                              | <b>No (N=33)</b> | <b>Yes (N=5)</b>  | <b>P.Overall</b> |
| <b>Okuda degeneration of elastic fibers</b>   |                  |                   | 0.697            |
| mild                                          | 20 (60.6%)       | 2 (50.0%)         |                  |
| moderate                                      | 11 (33.3%)       | 2 (50.0%)         |                  |
| severe                                        | 2 (6.06%)        | 0 (0.00%)         |                  |
| <b>Okuda proliferation of collagen fibers</b> |                  |                   | 0.425            |
| mild                                          | 12 (36.4%)       | 0 (0.00%)         |                  |
| moderate                                      | 19 (57.6%)       | 4 (100%)          |                  |
| severe                                        | 2 (6.06%)        | 0 (0.00%)         |                  |
| <b>Okuda loss of elastic fibers</b>           |                  |                   | 0.475            |
| mild                                          | 17 (51.5%)       | 1 (25.0%)         |                  |
| moderate                                      | 14 (42.4%)       | 3 (75.0%)         |                  |
| severe                                        | 2 (6.06%)        | 0 (0.00%)         |                  |

Continuous variables are described with count and percentages in parentheses. P values between absence and presence of the respective additional orthopedic diagnosis were calculated with Fisher's exact-test. One case of LSS patients could not be evaluated due to lack of material.

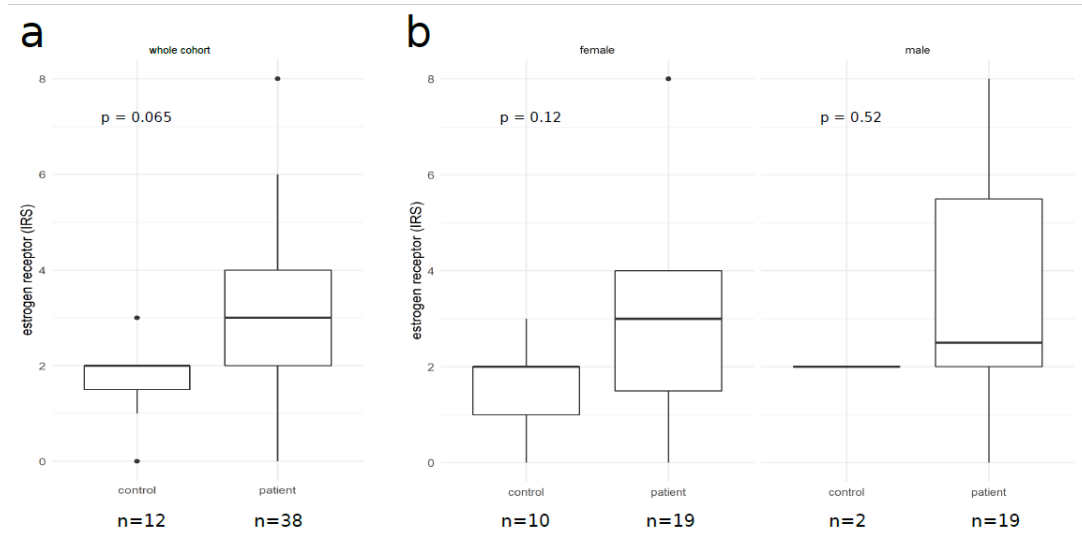

**Figure S1.** Box plots display ER  $\alpha$  expression as IRS with respect to control or patient status in the whole cohort (a) and differentiated by sex (b). The boxes signify the first to third quartiles with the median as bar. The vertical lines indicate all values with the ends representing minimum and maximum values, outliers are depicted as dots. *p* values are calculated with the Kruskal-Wallis-test.
